# Supplementary material for: Algorithmic Fairness of Machine Learning Models for Alzheimer Disease Progression
Source: PubMed Central journal article supplement — JAMA Netw Open. 2023 Nov 7;6(11):e2342203. doi: 10.1001/jamanetworkopen.2023.42203 (PMC10630899; doi:10.1001/jamanetworkopen.2023.42203), 2023-11-07
Supplement: jamanetwopen-e2342203-s001.pdf [file jamanetwopen-e2342203-s001.pdf]

## Supplemental Online Content

Yuan C, Linn KA, Hubbard RA. Algorithmic fairness of machine learning models for Alzheimer disease progression. *JAMA Netw Open*. 2023;6(11):e2342203.  
doi:10.1001/jamanetworkopen.2023.42203

### **eMethods.**

**eFigure 1.** Overview of Model Pipeline

**eFigure 2.** Absolute Differences in True Positive Rates Across Groups Defined by 3 Protected Attributes

**eFigure 3.** True Positive Rates of Mild Cognitive Impairment by Protected Attribute

**eFigure 4.** False Positive Rates of Mild Cognitive Impairment by Protected Attribute

**eFigure 5.** Predicted Probability of Progression by Protected Attribute

**eFigure 6.** Differences of Predicted Progression Probabilities by Protected Attribute

**eTable 1.** Summary Statistics for Protected Attributes and Predictor Variables by Cognitive Functioning Trajectory for Excluded Trajectories

**eTable 2.** Mean Prediction Performance Across 10 Test Sets

This supplemental material has been provided by the authors to give readers additional information about their work.

## eMethods

**Training details:** All experiments in this study were conducted on One Nvidia RTX 3090 GPU, one Inter i9-12900F CPU with 16 cores and 32G RAM. Pytorch 1.0 and Python 2.7 were used to define all models and training procedures.

For logistic regression, we used the implementation of logistic regression in sklearn library<sup>48</sup> for a three-class classification problem. We used L2 penalty (ridge regression) of weights, 1000 iterations, and the default solver lbfgs<sup>49</sup> to learn the weights. To train a SVM model, we followed the work from Nguyen.<sup>35</sup> Since SVM accepts fixed length feature vectors and it cannot handle subjects with different number of inputs timepoints. We trained different SVM models using 1 to 4 input timepoints (spaced 6 months apart) to predict the future observations. We trained 40 SVM models on four input timepoints (1, 2, 3 or 4 input timepoints) to predict clinical diagnosis as outcome for 10 future predictions (6, 12, 18, ..., 60 months), in which  $4 \times 10 = 40$  SVM models. The four timepoints were validated as the best settings in Nguyen's work.<sup>35</sup> The maximum iteration for training SVM is set to  $10^5$ . The SVM model utilized the radial basis function kernel, and the process of tuning hyperparameters remained consistent with the approach described in Nguyen's paper<sup>35</sup>.

We adapted the minimalRNN<sup>3</sup> for predicting disease progression. The input  $x_t$  to each RNN cell comprised the diagnosis  $s_t$  and continuous variables  $g_t$ ,  $x_t = [s_t, g_t]$ . The hidden state  $h_t$  was a combination of the previous hidden state  $h_{t-1}$  and the transformed input  $u_t$ ,  $u_t = \tanh \tanh (W_x x_t)$ ,  $h_t = f_t \odot h_{t-1} + (1 - f_t) \odot u_t$ . The forget gate  $f_t$  weighed the contributions of the previous hidden state  $h_{t-1}$  and current transformed input  $u_t$  toward the current hidden state  $h_t$ ,  $f_t = \sigma(U_h h_{t-1} + W_u u_t)$ . The model predicted the next month diagnosis  $\hat{s}_{t+1}$  and continuous variables using the hidden state  $h_t$ ,  $\hat{s}_{t+1} = (W_s h_t)$ ,  $\hat{g}_{t+1} = W_g h_t + g_t$ .  $\odot$  and  $\sigma$  denote element-wise product and the sigmoid function respectively. To train the RNN model, we set batch size as 128 and epoch number as 200. We use Adam<sup>50</sup> as the optimizer with learning rate of  $5 \times 10^{-4}$ , the value of  $\beta_1$  as 0.9 and  $\beta_2$  as 0.999, and weight decay as  $5 \times 10^{-7}$  to avoid overfitting. As in Nguyen's paper<sup>35</sup>, we used an unweighted sum of cross-entropy loss for categorical variable (diagnosis stage) and MAE loss for the continuous variables.

We used cross-validation for model selection and evaluation. The stratification was used during the partitioning to return stratified folds with non-overlapping groups and the folds are made by preserving the percentage of samples for each class. The selected model was determined by the best accuracy on validation data set. As the focus of this paper is on assessing the fairness in machine learning models on predicting AD as opposed to risk prediction model development, we do not report details of the predictors and model performance during the training phase in detail. Further description of variables and model performance can be found in Nguyen's work.<sup>35</sup>

**Population:** We employed the dataset provided by the TADPOLE challenge<sup>31</sup> where the organisers provided participants with a standard ADNI-derived dataset to train algorithms, removing the need for participants to pre-process the ADNI data or merge different spreadsheets.

**Model performance:** Following the same evaluation of model performance in Nguyen's work,<sup>35</sup> diagnosis classification accuracy was evaluated using the multiclass area under the operating curve (mAUC)<sup>51</sup> and balanced class accuracy (BCA) metrics. The mAUC was computed as the average of three two-class AUC (AD vs not AD, MCI vs. not MCI, and CN vs not CN). mAUC is independent of the group sizes and gives an overall measure of classification ability that accounts for relative likelihoods assigned to each class. The BCA for each class was computed as  $\frac{1}{2} \left( \frac{TP}{TP+FN} + \frac{TN}{TN+FP} \right)$  and the overall BCA was given by the mean of all the balanced accuracies for every cognitive trajectory. BCA considers the accuracy of the most likely classification. For both mAUC and BCA metrics, higher values indicate better performance. The performance was evaluated by averaging the results across 10 test sets for logistic regression, SVM, and RNN. The results for the three models are shown in Table S2.

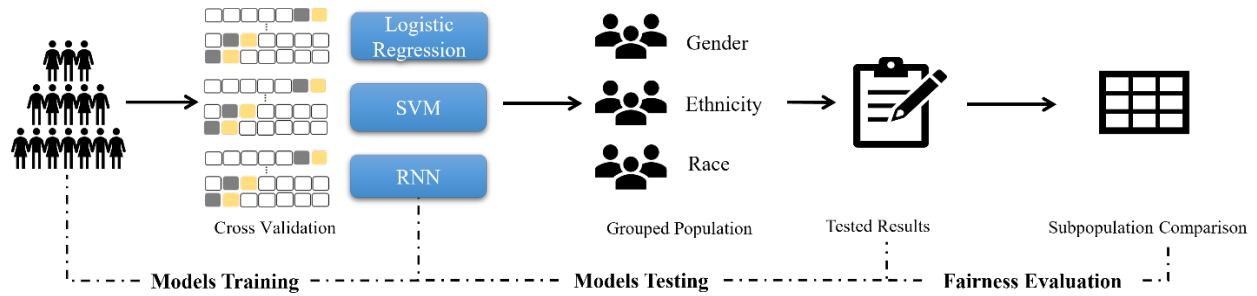

**eFigure 1. An overview of the model pipeline. Model Training:** we trained three ML models using cross-validation from entire populations to predict the progression to AD; **Model Testing:** we tested three models across the different grouped populations, including gender, ethnicity, and race; **Fairness Evaluation:** we assessed the fairness metrics on test results.

**eTable 1. Summary statistics for protected attributes and predictor variables stratified by cognitive functioning trajectory (CN-AD, MCI-CN, AD-stable and AD-MCI) for trajectories excluded from fairness analysis due to small sample size.**

|                                     | CN-AD                     | MCI-CN                    | AD-stable                 | AD-MCI                    |
|-------------------------------------|---------------------------|---------------------------|---------------------------|---------------------------|
| <b>Outcome Number</b>               | 24                        | 143                       | 337                       | 3                         |
| <b>Protected Attributes (N (%))</b> |                           |                           |                           |                           |
| <b>Gender</b>                       |                           |                           |                           |                           |
| Female                              | 14 (58%)                  | 82 (57%)                  | 151 (45%)                 | 1 (33%)                   |
| Male                                | 10 (42%)                  | 61 (43%)                  | 186 (55%)                 | 2 (67%)                   |
| <b>Ethnicity</b>                    |                           |                           |                           |                           |
| Hispanic                            | 0 (0%)                    | 7 (5%)                    | 14 (4%)                   | 0 (0%)                    |
| Non-Hispanic                        | 24 (100%)                 | 136 (95%)                 | 323 (96%)                 | 3 (100%)                  |
| <b>Race</b>                         |                           |                           |                           |                           |
| Asian                               | 0 (0%)                    | 0 (0%)                    | 7 (2%)                    | 0 (0%)                    |
| Black                               | 1 (4%)                    | 4 (3%)                    | 14 (4%)                   | 0 (0%)                    |
| White                               | 23 (96%)                  | 139 (97%)                 | 312 (93%)                 | 3 (100%)                  |
| Others                              | 0 (0%)                    | 0 (0%)                    | 4 (1%)                    | 0 (0%)                    |
| <b>Predictors (mean (SD))</b>       |                           |                           |                           |                           |
| Clinical Dementia Rating Scale      | 1.99 (2.87)               | 0.33 (0.54)               | 5.61 (2.83)               | 1.76 (0.89)               |
| ADAS-Cog11                          | 10.8 (8.0)                | 5.3 (2.9)                 | 22.5 (9.3)                | 10.7 (2.3)                |
| ADAS-Cog13                          | 17.0 (10.8)               | 8.3 (4.5)                 | 33.0 (10.2)               | 19.1 (3.0)                |
| Mini-Mental State Examination       | 27.1 (3.4)                | 28.9 (1.2)                | 21.5 (4.2)                | 26.9 (12.3)               |
| RAVLT immediate                     | 35.4 (11.3)               | 46.0 (11.1)               | 20.4 (7.9)                | 29.7 (6.0)                |
| RAVLT learning                      | 4.2 (2.6)                 | 5.7 (2.3)                 | 1.6 (1.7)                 | 3.0 (1.9)                 |
| RAVLT forgetting                    | 4.2 (2.4)                 | 3.6 (2.8)                 | 4.2 (1.8)                 | 4.6 (2.1)                 |
| RAVLT forgetting percent            | 56.0 (33.4)               | 34.5 (30.7)               | 92.8 (17.6)               | 63.2 (28.5)               |
| Functional Activities Questionnaire | 5.5 (8.1)                 | 0.6 (1.5)                 | 1.6 (7.5)                 | 2.8 (1.7)                 |
| Montreal Cognitive Assessment       | 2.11 (0.42)               | 2.60 (0.24)               | 16.2 (4.8)                | 22.8 (1.9)                |
| Ventricles                          | $4.11 (2.03) \times 10^4$ | $2.96 (1.42) \times 10^4$ | $5.21 (2.50) \times 10^4$ | $8.23 (2.86) \times 10^4$ |
| Hippocampus                         | $6.33 (0.88) \times 10^3$ | $7.65 (0.85) \times 10^3$ | $5.61 (1.08) \times 10^3$ | $5.91 (0.30) \times 10^3$ |
| Whole brain volume                  | $9.50 (0.08) \times 10^6$ | $1.05 (0.09) \times 10^6$ | $0.96 (0.11) \times 10^6$ | $1.04 (0.02) \times 10^6$ |
| Entorhinal cortical volume          | $3.46 (0.82) \times 10^3$ | $3.97 (0.58) \times 10^3$ | $2.74 (0.71) \times 10^3$ | $3.38 (0.24) \times 10^3$ |
| Fusiform cortical volume            | $1.61 (0.19) \times 10^4$ | $1.86 (0.22) \times 10^4$ | $1.51 (0.27) \times 10^4$ | $1.65 (0.13) \times 10^4$ |

|                                 |                               |                               |                               |                               |
|---------------------------------|-------------------------------|-------------------------------|-------------------------------|-------------------------------|
| Middle temporal cortical volume | 1.81 (0.27) × 10 <sup>4</sup> | 2.08 (0.26) × 10 <sup>4</sup> | 1.68 (0.32) × 10 <sup>4</sup> | 1.91 (0.23) × 10 <sup>4</sup> |
| Intracranial volume             | 1.48 (0.15) × 10 <sup>6</sup> | 1.50 (0.14) × 10 <sup>6</sup> | 1.53 (0.18) × 10 <sup>6</sup> | 1.67 (0.12) × 10 <sup>6</sup> |
| Florbetapir (18F-AV-45) - PET   | 1.3 (0.2)                     | 1.1 (0.1)                     | 1.1 (0.1)                     | 1.3 (0.2)                     |
| Fluorodeoxyglucose (FDG) - PET  | 1.2 (0.1)                     | 1.3 (0.1)                     | 1.3 (0.1)                     | 1.2 (0.1)                     |
| Beta-amyloid (CSF)              | 0.79 (0.44) × 10 <sup>3</sup> | 1.40 (0.57) × 10 <sup>3</sup> | 0.64 (0.38) × 10 <sup>3</sup> | 0.56 (0.09) × 10 <sup>3</sup> |
| Total tau                       | 3.13 (0.92) × 10 <sup>2</sup> | 2.32 (0.76) × 10 <sup>2</sup> | 3.69 (1.41) × 10 <sup>2</sup> | 2.37 (0.09) × 10 <sup>2</sup> |
| Phosphorylated tau              | 33.1 (1.1)                    | 20.9 (7.8)                    | 36.5 (15.0)                   | 22.2 (0.7)                    |

Note: AD-stable indicates people observed with the same stage at baseline and final visit; CN-AD denotes CN progress to AD; MCI-CN denotes that MCI progress to CN; AD-MCI denotes that AD convert to MCI. SB: Sum of boxes, ADAS: Alzheimer's Disease Assessment Scale, RAVLT: Rey Auditory Verbal Learning Test.

## eTable 2. Prediction performance averaged across 10 test sets.

|     | mAUC<br>(mean ± SD) | BCA<br>(mean ± SD) |
|-----|---------------------|--------------------|
| LR  | 0.916 ± 0.017       | 0.825 ± 0.023      |
| SVM | 0.921 ± 0.011       | 0.831 ± 0.021      |
| RNN | 0.949 ± 0.008       | 0.891 ± 0.017      |

In each cell, the two numbers represent the mean and standard deviation derived from 10 tests. mAUC = multiclass area under the operating curve; BCA = balanced class accuracy. LR= logistic regression; SVM = Support Vector Machine; RNN = recurrent neural networks.

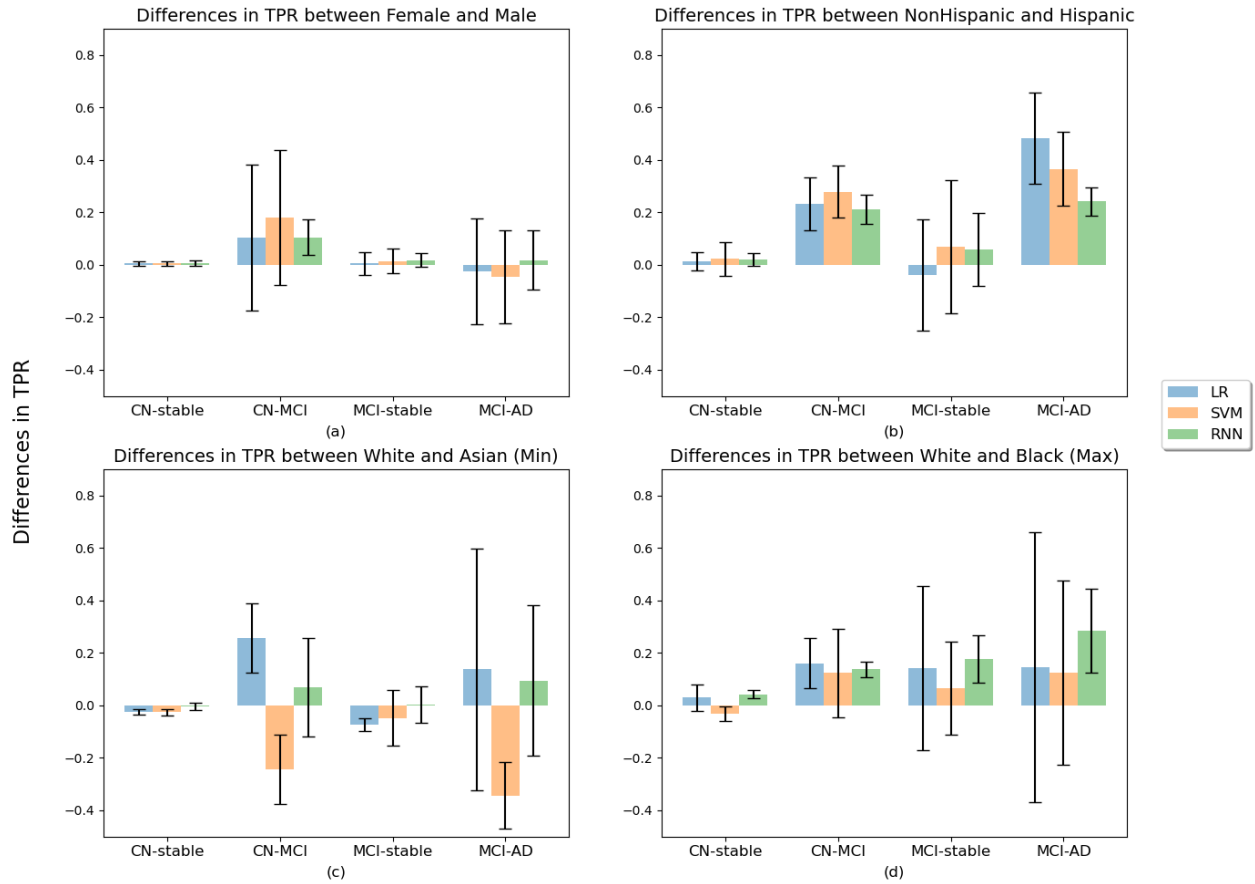

**eFigure 2 Absolute differences in TPR across groups defined by the three protected attributes. For gender, the difference in TPR is between male and female. For ethnicity, the difference in TPR is reported between Non-Hispanic and Hispanic. For race, since there are four groups, we first compute all pairwise differences with the “White” group which we considered as a reference as it had the largest sample size. We then report the minimum differences in TPR, which resulted from the contrast between the White and Asian groups, and the maximum differences, which resulted from comparing the White and Black groups. Bars represent mean values across 10 test sets and error bars represent a corresponding standard deviation of the 10 mean values.**

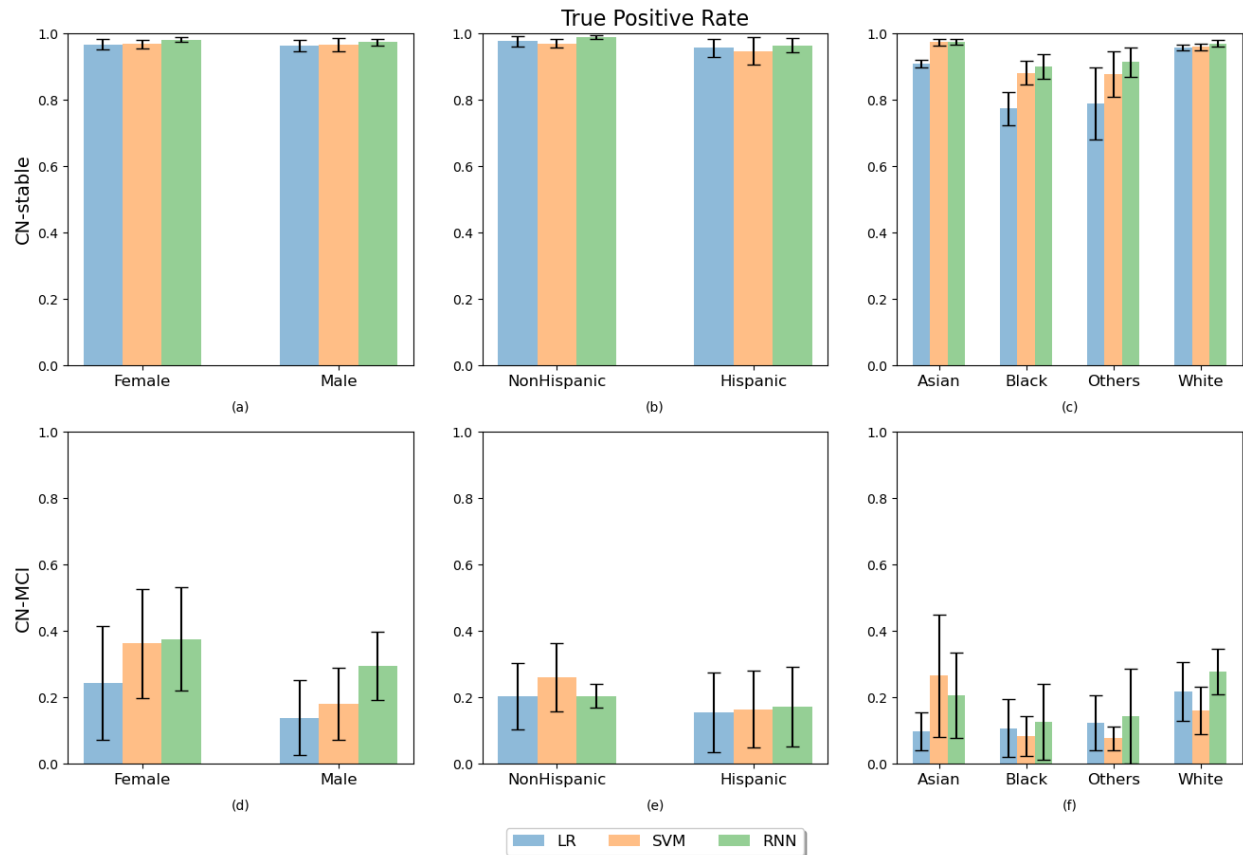

**eFigure 3. Comparison of True Positive Rates across subgroups of gender, ethnicity and race for three models for participants with cognitively normal at baseline. The results are averaged over 10 test sets using predictions from the LR, SVM, and RNN models. Bars present the mean values across 10 test sets and error bars represent the standard deviation of the 10 mean values.**

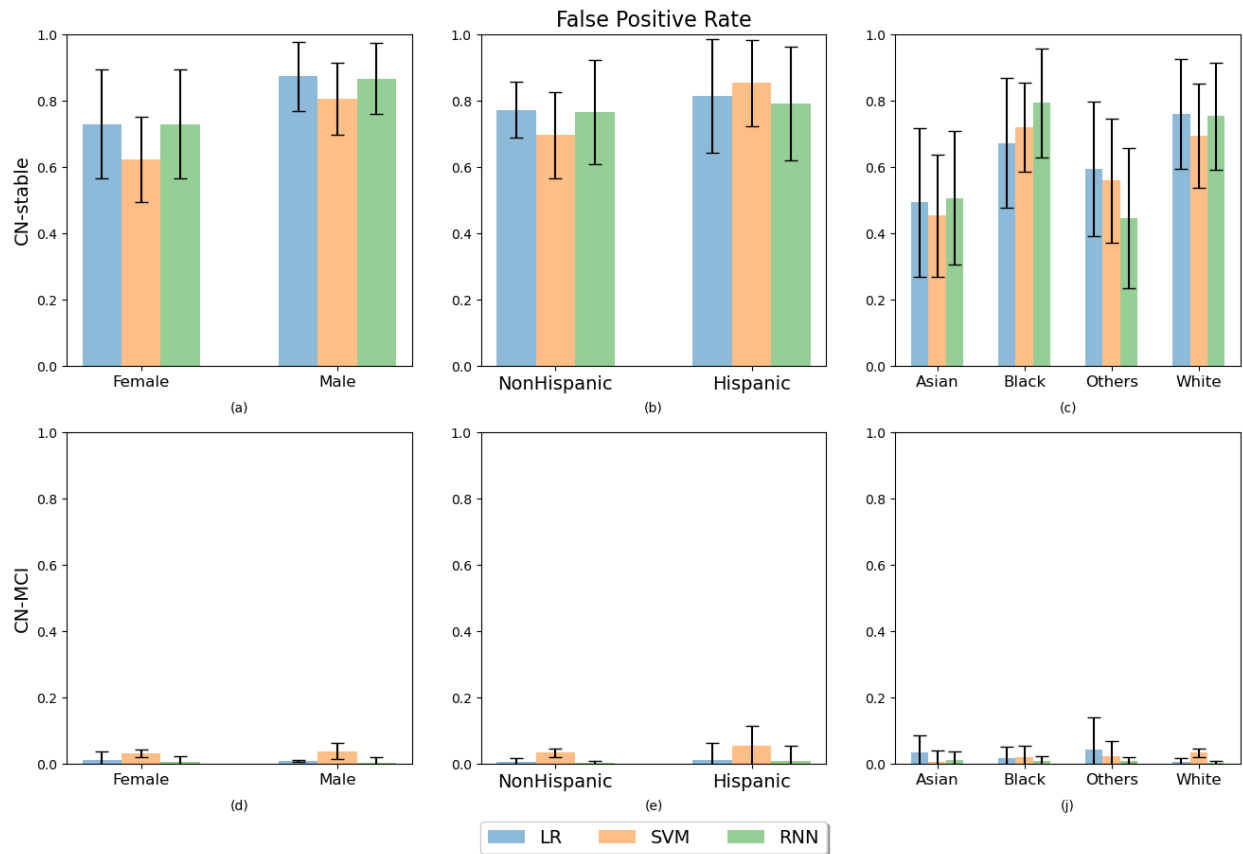

**eFigure 4. Comparison of False Positive Rates across subgroups of gender, ethnicity and race for three models for participants with cognitively normal at baseline. The results are averaged over 10 test sets using predictions from the LR, SVM, and RNN models. Bars present the mean values across 10 test sets and error bars represent the standard deviation of the 10 mean values.**



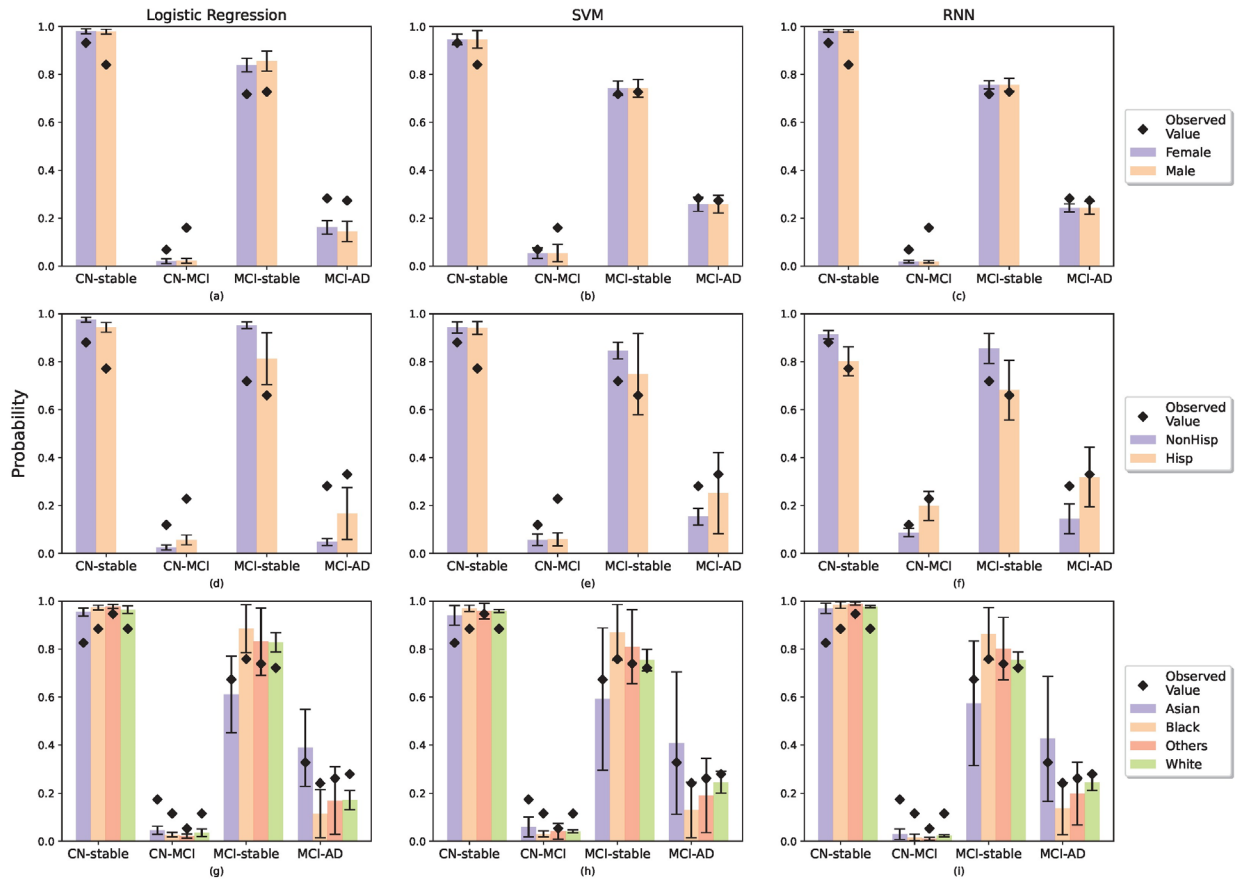

**eFigure 5. Comparison of predicted probability of progression cases across subgroups of gender, ethnicity, and race for three models. The results are averaged over 10 test sets using predictions from the LR, SVM, and RNN models. Bars represent the mean values across 10 test sets and error bars represent a corresponding standard deviation of the 10 mean values. Dots represent the average value of the empirical probability of each trajectory stratified by demographic subgroup on 10 test sets.**

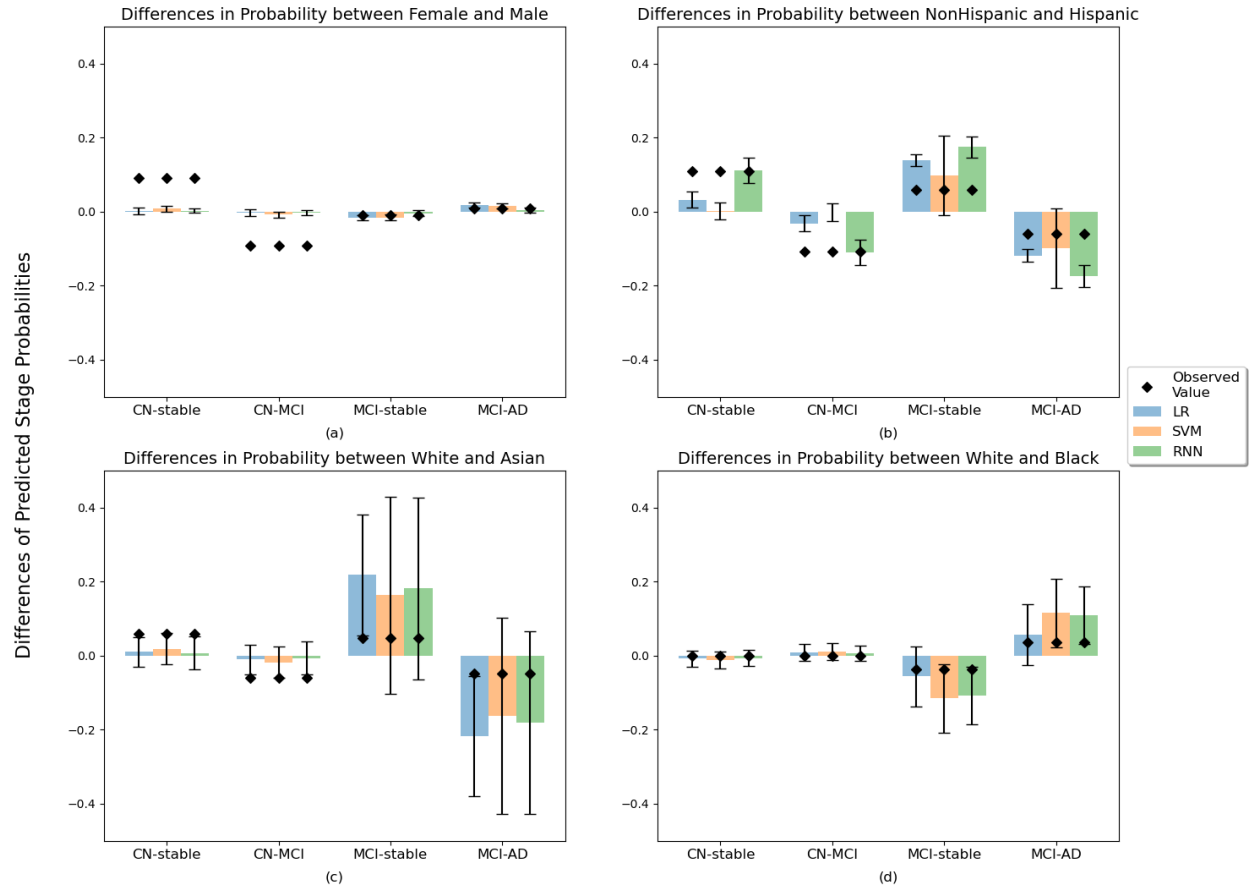

**eFigure 6. Differences of predicted progression probabilities between groups of each protected attribute with three evaluated models. The results are averaged over 10 test sets using predictions from the LR, SVM, and RNN models. Bars represent the mean values across 10 test sets and error bars represent a corresponding standard deviation of the 10 mean values. Dots represent the average values of differences of the empirical probability of each trajectory stratified by demographic subgroup on 10 test sets.**
