# Supplementary material for: Algorithmic Fairness of Machine Learning Models for Alzheimer Disease Progression
Source: PubMed Central journal article supplement — JAMA Netw Open. 2023 Nov 7;6(11):e2342203. doi: 10.1001/jamanetworkopen.2023.42203 (PMC10630899; doi:10.1001/jamanetworkopen.2023.42203), 2023-11-07
Supplement: jamanetwopen-e2342203-s002.pdf [file jamanetwopen-e2342203-s002.pdf]

## **Data Sharing Statement**

Yuan. Algorithmic Fairness of Machine Learning Models for Alzheimer Disease Progression. *JAMA Netw Open*. Published online November 8, 2023. doi:10.1001/jamanetworkopen.2023.42203

### **Data**

**Data available:** No
